# Supplementary material for: Multiple sclerosis and type 1 diabetes: a Mendelian randomization study of European ancestry
Source: publisher site journal article supplement (doi:10.1515/med-2025-1363), 2025-01-01
Supplement: Supplementary file 1 [file j_med-2025-1363_suppl_004.docx]

**Figure S1** Simultaneous scatter plot of the Mendelian randomization analysis

**(A)** Simultaneous scatter plot showing the relationship between Multiple sclerosis on Type 1 diabetes; **(B)** Simultaneous scatter plot showing the relationship between Type 1 diabetes on Multiple sclerosis

**Figure S2** Leave-one-out plot of the Mendelian randomization analysis

**(A)** MR Leave-one-out plot for the genetic association between Multiple sclerosis and risk of Type 1 diabetes; **(B)** MR Leave-one-out plot for the genetic association between Type 1 diabetes and risk of Multiple sclerosis.
